# Supplementary material
Source: PubMed Central journal article supplement (PMC4023766)
Supplement: AAC.02286-13_zac004142704so1.pdf [file AAC.02286-13_zac004142704so1.pdf]

**Supplementary Material.**

**Table S1. Primers used in this study.**

| <b>T681A-S288A Strain</b>                                |                                     |         |
|----------------------------------------------------------|-------------------------------------|---------|
| Hsp90-1363-F (KpnI)                                      | TATAGGTACCGACTCTTGCCAAGCTGCTCCGCTA  | Forward |
| Hsp90-3179-R (BamHI)                                     | TTGGATCCGTCAACCTCCTCCATGGCACTCT     | Reverse |
| Hsp90-569-F (KpnI)                                       | CCGTGGTACCAAGATCATTC                | Forward |
| Hsp90-EGFP-R (NotI)                                      | CCGGGCGGCCGCTTTACTTGTACA            | Reverse |
| pUCGH-RA-F (HindIII)                                     | TTAAGCTTTATTCTCGTTCACCTCGC          | Forward |
| pUCGH-RA-R (HindIII)                                     | TTAAGCTTGGTACCTGGCGTCTATAAAACCCTTCC | Reverse |
| T681A-F                                                  | AGGAGGCCGAG <u>G</u> CTACCGAGGAAA   | Forward |
| T681A-R                                                  | TTTCCTCGGTAG <u>C</u> CTCGGCCTCCT   | Reverse |
| S288A-F                                                  | AGGAGTATGCC <u>G</u> CCTTCTACAAGT   | Forward |
| S288A-R                                                  | ACTTGTAGAAGG <u>C</u> GGCATACTCCT   | Reverse |
| <b>S49A, K27A, K27R, K27Δ, K271A, K27A-K271A Strains</b> |                                     |         |
| pBS-LA-F (KpnI)                                          | TTGGTACCACGTGAGCCGCCAGAAGGTATG      | Forward |
| pBS-LA-R (ApaI)                                          | TTGGGCCCTGCAGCCCCAATGAAAGC          | Reverse |
| pHsp90-F (ClaI)                                          | GTGTATCGATATAGGTGGCGAGCTGGTTTTCC    | Forward |
| Hsp90-1200-R (NotI)                                      | TTGCGGCCGCGAGTCTCACGAGACAGGTTG      | Reverse |
| Hsp90-1236-F (AgeI)                                      | ATACCGGTATTGGTATGACCAAGG            | Forward |
| S49A-F                                                   | TCCGCTACCAGGCCTTGTCGGAT             | Forward |
| S49A-R                                                   | ATCCGACAAGGCCTGGTAGCGGA             | Reverse |
| K27A-F                                                   | TCTACTCCAAC <u>G</u> CGGAGATCTTCC   | Forward |
| K27A-R                                                   | GGAAGATCTCC <u>G</u> CGTTGGAGTAGA   | Reverse |
| K27R-F                                                   | TCTACTCCAAC <u>A</u> GGAGATCTTCC    | Forward |
| K27R-R                                                   | GGAAGATCTCC <u>T</u> GTTGGAGTAGA    | Reverse |
| K27Δ-F                                                   | GTCTACTCCAACGAGATCTTCCTG            | Forward |
| K27Δ-R                                                   | CAGGAAGATCTCGTTGGAGTAGAC            | Reverse |
| K270A-F                                                  | TCAACAAGACC <u>G</u> CGCCCATCTGGA   | Forward |
| K270A-R                                                  | TCCAGATGGG <u>C</u> CGGTCTTGTTGA    | Reverse |

The mutated nucleotides are underlined in the complementary primers used for fusion PCR.

**Figure S1. Genetic constructs of this study.**

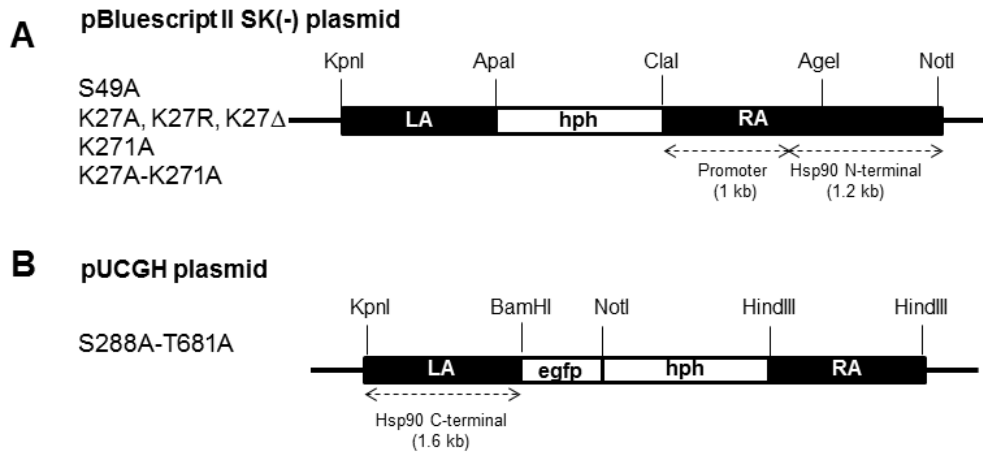

**(A)** A sequence containing the *hsp90* promoter and the 1 to 1.2 kb N-terminal region of *hsp90* containing the selected mutation was cloned in plasmid pBluescript II SK(-) downstream of the hygromycin resistance cassette (*hph*) at ClaI and NotI sites (right arm, RA). The AgeI site was used for the addition of the segment containing the K271A mutation to obtain the double K27A-K271A mutant. The left arm (LA) consisted of an approximately 1-kb sequence located downstream of the *hsp90* promoter and cloned at KpnI and ApaI sites.

**(B)** For the S288A-T681A strain containing mutations that are located in the distal portion, the 1.6-kb C-terminal sequence of *hsp90* was cloned at KpnI and BamHI sites (left arm, LA) in the pUCGH plasmid containing the enhanced green fluorescent protein gene (*egfp*), the hygromycin resistance cassette (*hph*) and a right arm (RA) consisting of an approximately 1.2 kb sequence

located downstream of Hsp90 cloned at HindIII site. The more distal mutation (T681A) was induced first by cloning the product of a fusion PCR at KpnI and NotI sites. The S288A mutation was then induced by a second fusion PCR amplified from this first amplicon and cloned at KpnI and BamHI sites.

**Figure S2. *In vitro* activity of the lysine deacetylase inhibitor trichostatin A (TSA) against *Aspergillus fumigatus*.**

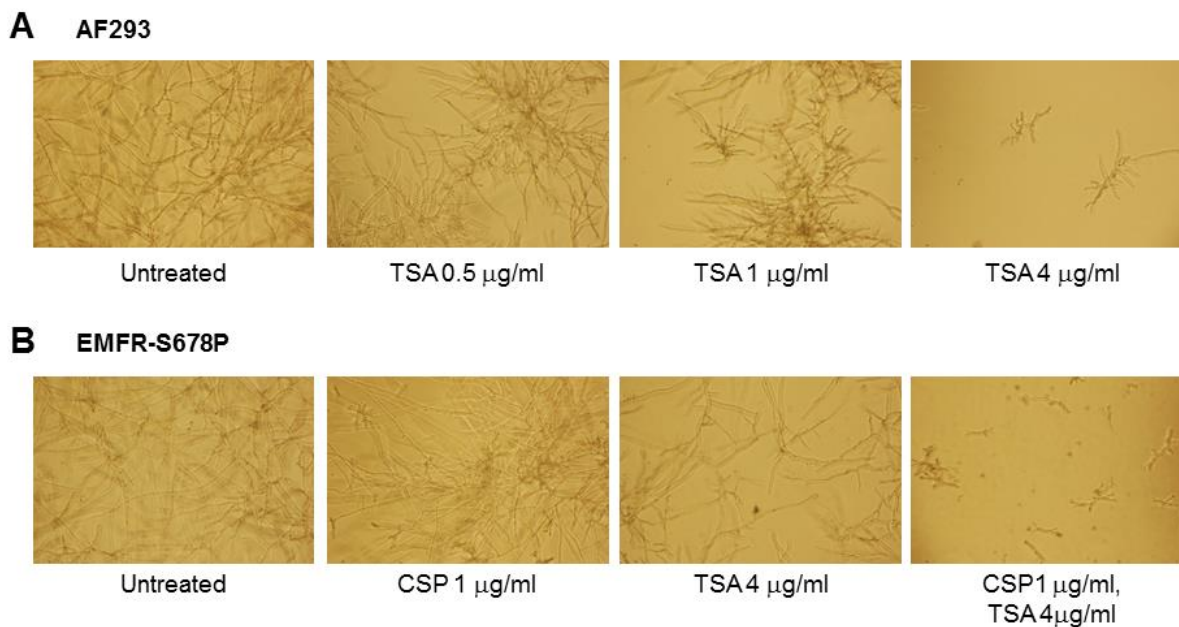

**(A)** The *in vitro* activity of TSA was tested against the *A. fumigatus* wild-type strain AF293 within a range of concentrations from 0.125 to 8  $\mu\text{g/ml}$ . The minimal effective concentration (MEC) was assessed at 0.5  $\mu\text{g/ml}$ , while 50% and 90% inhibition were achieved at 1  $\mu\text{g/ml}$  and 4  $\mu\text{g/ml}$ , respectively.

**(B)** TSA only had a modest activity against the EMFR-S678P strain, resistant to caspofungin (CSP). However, TSA reduced resistance to caspofungin achieving more than 50% inhibition in drug combination.

Pictures taken after 24-hour growth in RPMI 1640.
